# Supplementary material
Source: PubMed Central journal article supplement (PMC3837880)
Supplement: AAC.01773-13_zac012132395so1.pdf [file AAC.01773-13_zac012132395so1.pdf]

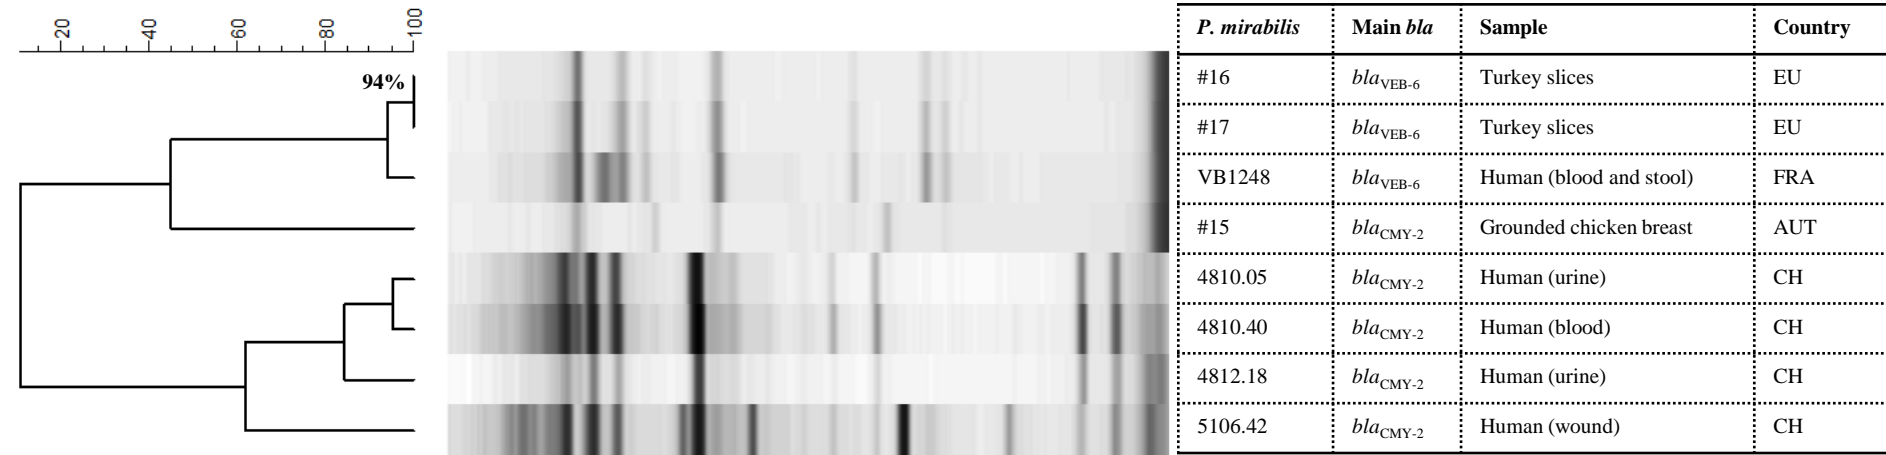

**Figure 1S.** Results of the rep-PCR analysis. The two VEB-6-positive *P. mirabilis* isolates found in poultry meat (#16 and #17) in Bern (Switzerland) are indistinguishable to each other and possess a 94% genetic identity with the VEB-6-positive strain (VB1248) found in a French patient. The CMY-2-positive isolates found in humans in Bern (n=4; i.e., 4810.05, 4810.40, 4812.18, and 5106.42) do not show any genetic relation with those detected in meat.

**Table 1S:****Primers used for the characterization of the class 1 integron**

| Number | Primer          | Nucleotide sequence (5'-3') | Positions                               | Designed/Reference |
|--------|-----------------|-----------------------------|-----------------------------------------|--------------------|
| 1      | S026-outR       | CAACCTGAAGGGCAACAG          | -812(-794)                              | (1)                |
| 2      | IRi             | TGTCGTTTTTCAGAAGACGG        | 1-19                                    | (1)                |
| 3      | Int1-F          | GGGTCAAGGATCTGGATTTCG       | 736-756                                 | (2)                |
| 4      | Int1-R          | ACATGCGTGTAAATCATCGTCG      | 273-294                                 | (2)                |
| 5      | 5-CS            | GGCATCCAAGCAGCAAGC          | 1256-1273                               | (3)                |
| 6      | 5-CSINV         | GCTCCATAACATCAAACATCG       | 1290-1310                               | (3)                |
| 7      | tnpRTn3-R       | TGGAGCGGGCAATACTGA          | 1727-1744                               | (1)                |
| 8      | AACA4-R         | TGTTTCGCTCGAATGCCTG         | 2538-2555                               | (1)                |
| 9      | aadB-F          | CGATCGATGCACGGCTA           | 2728-2744                               | (1)                |
| 10     | AADB-B          | CGCATATCGCGACCTGAAAGC       | 3147-3167                               | (3)                |
| 11     | dhfrA1-R        | CTTGAACGTGTTACGACCGC        | 3419-3438                               | This study         |
| 12     | QACEΔ1-B        | CAAGCTTTTGCCCATGAAGC        | 4649-4668;<br>8927-8946;<br>14075-14094 | (3)                |
| 13     | Sul-F           | GACGGTGTTTCGGCATTCT         | 4765-4782;<br>9043-9060;<br>14191-14208 | (1)                |
| 14     | Sul1-B          | GCAAGGCGGAAACCCGCGCC        | 5221-5240;<br>9499-9518;<br>14647-14666 | (3)                |
| 15     | Sul1-newR       | GTGATTGCGCTTCGCAGATC        | 5513-5532;<br>9791-9910;<br>14939-14958 | This study         |
| 16     | tetATn1721-outR | CATGATGGCGTAGTCGAC          | 5877-5894                               | (1)                |
| 17     | tetAintR        | CTCCGGCAAAAAGGAAACAGC       | 6154-6173                               | This study         |
| 18     | 5' of VEB       | CAACCACAACGCAAACCCCTT       | 7158-7177                               | This study         |
| 19     | VEB-OUT2        | GGAATTACTATTTGAATAAATAA     | 7549-7571                               | (4)                |
| 20     | VEBINV1         | CAGTTTGAGCATTTGAATACAC      | 8378-8394                               | (3)                |
| 21     | VEBINV2         | AGCGTATTTGTTGCAGAGTCC       | 7627-7647                               | (3)                |
| 22     | VEB-OUT1        | AATATCCTTTTTACGATTTTCAT     | 8426-8448                               | (4)                |
| 23     | 3' of VEB       | TTATGACAACGGCGGAAGGG        | 8789-8808                               | This study         |
| 24     | orf513-F        | ATGGTTTCATGCGGGTT           | 10490-10506                             | (1)                |
| 25     | orf513-R        | CTGAGGGTGTGAGCGAG           | 10948-10964                             | (1)                |
| 26     | 3' of Orf513    | AACAGAAAACAGCCAAGGCG        | 11711-11730                             | This study         |
| 27     | qnrA1-outF      | CCTTTGCCGATCTGGATG          | 12712-12729                             | (1)                |
| 28     | qnrA1-newR      | CTTCGAGGTTGACCCGTCTG        | 12740-12759                             | This study         |
| 29     | qnrA1-R         | CTAATCCGGCAGCACTAT          | 12813-12830                             | (1)                |
| 30     | PM4-F           | CAAGCGCTCTTTGGCAATCA        | 13009-13028                             | This study         |
| 31     | orfPM4-outR     | TAAGTGCTTCCCAGAGCGTG        | 13168-13187                             | This study         |
| 32     | PM5-F           | CTGCAAACACGAGCACAG          | 13578-13597                             | This study         |
| 33     | orf5-R          | GATTTTCGAGTTCTAGGCG         | 15633-15650                             | (1)                |
| 34     | orf6-mF         | CTTCCATCATCAACCCTG          | 15767-15784                             | (1)                |
| 35     | tnpA6100-F      | CGATCAGCTATCGCGACCTT        | 16233-16255                             | This study         |
| 36     | tnpA6100-F2     | CGCGGTTTCAAATCGATCCC        | 16715-16734                             | This study         |
| 37     | tnpA6100-R2     | GCCAGCTCCTGACAGTTCAA        | 17056-17075                             | This study         |
| 38     | IRt             | TGTCATTTTCAGAAGACGA         | 17112-17129                             | (1)                |
| 39     | S044-R          | TTCTCCCTGATCTTCATC          | 17620-17637                             | (1)                |

## Primers used for the characterization of the class 2 integron

| Number | Primer      | Nucleotide sequence (5'-3')    | Positions | Designed/Reference |
|--------|-------------|--------------------------------|-----------|--------------------|
| 1      | Int2-F      | CACGGATATGCGACAAAAAGGT         | 484-505   | (2)                |
| 2      | Int2_F_SSE  | TGCACCATACAGCAGCGTAA           | 142-161   | This study         |
| 3      | Int2_seq1_F | TAAGCAGACAGCTCCTTGGC           | 1774-1793 | This study         |
| 4      | 125`CS      | TTTTTGTGCTGCCATATCCGTG         | 495-505   | (5)                |
| 5      | 23`CS       | TGGGCTGAGAGAGTGGT              | +253--269 | (5)                |
| 6      | dfrA1       | AGCTGTTCACCTTTGGC              | 941-957   | (5)                |
| 7      | hep74       | CGGGATCCCGGACGGCATGCACGATTGTGA | 723-738   | (6)                |
| 8      | hep51       | GATGCCATCGCAAGTACGAG           | 2913-2932 | (6)                |
| 9      | hep51-RC    | CTCGTACTTGCGATGGCATC           | 2913-2932 | This study         |
| 10     | satR        | TCATCTGTGCTCCCGAG              | 1937-1954 | (5)                |
| 11     | aadAF       | ATGAGGGAAGCGGTGATCGCC          | 2019-2039 | (2)                |
| 12     | aadA1       | TCGATGACGCCAACTAC              | 2064-2080 | (5)                |
| 13     | Aada1_IntF  | ACGTTGTCCCGCATTTGGTA           | 2583-2602 | This study         |
| 14     | ybfA_F      | GTGAGACAACCAGATGGGCA           | 3832-3851 | This study         |
| 15     | ybfB_R      | TGCCCATCTGGTTGTCTCAC           | 3832-3851 | This study         |
| 16     | ybeB-Fout   | TTTCGCTTGCCCTGACAGAT           | 3328-3347 | This study         |
| 17     | ybgA_R      | CAATGAGTTCTTGAGCGCGG           | 4523-4542 | This study         |

## REFERENCES

1. **Siebor E, Neuwirth C.** 2011. The new variant of *Salmonella* genomic island 1 (SGI1-V) from a *Proteus mirabilis* French clinical isolate harbours *bla*<sub>VEB-6</sub> and *qnrA1* in the multiple antibiotic resistance region. *The Journal of antimicrobial chemotherapy* **66**:2513-2520.
2. **Mazel D, Dychinco B, Webb VA, Davies J.** 2000. Antibiotic resistance in the ECOR collection: integrons and identification of a novel aad gene. *Antimicrob Agents Chemother* **44**:1568-1574.
3. **Naas T, Benaoudia F, Massuard S, Nordmann P.** 2000. Integron-located VEB-1 extended-spectrum  $\beta$ -lactamase gene in a *Proteus mirabilis* clinical isolate from Vietnam. *The Journal of antimicrobial chemotherapy* **46**:703-711.
4. **Hujer KM, Hujer AM, Hulten EA, Bajaksouzian S, Adams JM, Donskey CJ, Ecker DJ, Massire C, Eshoo MW, Sampath R, Thomson JM, Rather PN, Craft DW, Fishbain JT, Ewell AJ, Jacobs MR, Paterson DL, Bonomo RA.** 2006. Analysis of antibiotic resistance genes in multidrug-resistant *Acinetobacter* sp. isolates from military and civilian patients treated at the Walter Reed Army Medical Center. *Antimicrob Agents Chemother* **50**:4114-4123.
5. **Ramirez MS, Quiroga C, Centron D.** 2005. Novel rearrangement of a class 2 integron in two non-epidemiologically related isolates of *Acinetobacter baumannii*. *Antimicrob Agents Chemother* **49**:5179-5181.
6. **White PA, McIver CJ, Rawlinson WD.** 2001. Integrons and gene cassettes in the enterobacteriaceae. *Antimicrob Agents Chemother* **45**:2658-2661.
